# Supplementary material for: The computer-assisted interview In My Shoes can benefit shy preschool children's communication
Source: PLoS One. 2017 Aug 15;12(8):e0182978. doi: 10.1371/journal.pone.0182978 (PMC5557539; doi:10.1371/journal.pone.0182978)
Supplement: S1 Dataset — (XLSX) [file pone.0182978.s001.xlsx]

## Sheet: Blad1
S1 Dataset. Child verbal and non-verbal behavior coded at the two time points.
Interview method	Child age	Body tenseness	Body tenseness	Talkativeness		Answer latency		Amount of encouragement needed		Facial Expression		Eye-contact		Rapport length
1=IMS, 2=Standard verbal method		Time 1	Dummy variable	Time 1	Time 2	Time 1	Time 2	Time 1	Time 2	Time 1	Time 2	Time 1	Time 2	Minutes and seconds
1	4	4	2	3	3	3	4	4	4	3	4	2	2	10:14:00
1	4	2	1	2	4	3	5	4	5	2	5	1	2	10:32:00
1	4	2	1	1	4	3	5	4	5	3	4	4	5	09:45:00
2	4	1	1	2	4	1	3	1	4	1	3	1	2	13:37:00
1	4	2	1	3	4	5	5	5	5	3	4	3	2	15:00:00
1	4	2	1	1	3	2	4	2	5	2	3	2	4	13:59:00
1	4	4	2	4	5	3	4	2	4	3	4	3	4	18:20:00
2	4	2	1	3	3	4	3	4	3	3	3	4	2	03:19:00
1	4	3	2	4	3	4	4	5	5	4	4	4	3	13:33:00
1	4	3	2	3	4	4	5	4	4	3	4	5	4	11:30:00
1	4	4	2	4	5	5	5	5	5	4	5	5	5	09:06:00
2	4	3	2	3	4	5	5	5	5	4	5	4	3	05:35:00
2	4	5	2	4	5	5	5	5	5	5	5	5	5	05:50:00
1	4	2	1	3	4	4	4	4	5	3	4	4	3	09:19:00
1	4	2	1	1	3	2	2	2	4	2	3	2	2	08:52:00
1	4	3	2	3	4	3	3	4	3	3	3	3	3	09:32:00
2	4	2	1	2	1	1	1	1	1	1	1	1	1	04:37:00
2	4	3	2	2	2	5	5	5	5	3	3	5	4	06:33:00
2	4	3	2	3	3	2	3	4	4	3	3	3	4	05:38:00
2	4	3	2	4	5	5	5	4	5	4	4	5	4	06:59:00
2	4	5	2	5	5	5	5	5	5	4	4	3	3	05:59:00
2	4	5	2	5	5	5	5	5	5	4	4	3	4	05:44:00
1	4	3	2	1	2	4	3	n/a	4	3	4	3	3	12:23:00
1	4	4	2	5	4	5	5	5	5	4	5	4	3	12:41:00
1	4	2	1	2	3	3	3	4	4	3	3	2	1	12:52:00
2	4	2	1	3	2	4	2	4	3	2	2	1	1	06:45:00
2	4	5	2	5	5	5	5	5	5	4	5	4	5	07:35:00
2	4	4	2	4	5	4	5	4	5	4	4	5	4	07:43:00
1	4	4	2	4	5	4	4	4	5	4	5	5	4	14:38:00
2	4	2	1	2	3	2	3	2	3	2	3	1	1	13:40:00
2	4	3	2	2	4	2	3	2	4	4	4	1	4	05:27:00
1	5	2	1	2	3	3	4	2	4	3	4	4	4	12:03:00
1	5	3	2	2	3	2	3	2	4	3	4	4	3	11:36:00
2	5	2	1	2	3	5	3	5	4	3	3	5	4	05:01:00
2	5	2	1	5	5	4	5	4	5	3	4	2	3	06:10:00
2	5	2	1	4	4	3	4	5	5	3	3	3	3	06:43:00
2	5	5	2	5	5	4	4	5	5	5	5	5	5	08:44:00
1	5	4	2	3	4	4	5	5	5	5	5	5	5	11:02:00
1	5	4	2	3	4	5	5	5	5	2	4	2	1	09:44:00
1	5	3	2	2	2	5	4	5	4	3	3	4	2	08:58:00
2	5	2	1	3	3	4	4	5	5	3	3	4	4	03:13:00
2	5	3	2	3	3	2	3	4	5	3	3	2	2	03:38:00
2	5	3	2	3	5	3	4	4	4	4	4	4	5	02:37:00
2	5	4	2	4	4	5	5	5	5	4	4	3	4	04:17:00
2	5	5	2	5	5	5	5	5	5	5	4	5	5	06:32:00
2	5	5	2	5	5	5	4	5	5	4	5	5	n/a	05:59:00
1	5	3	2	3	3	4	4	5	5	3	4	5	5	09:37:00
1	5	2	1	2	2	2	3	3	4	n/a	3	2	1	10:15:00
1	5	3	2	2	4	5	4	3	4	3	4	4	3	10:14:00
1	5	3	2	2	4	3	4	5	5	3	4	3	3	08:03:00
1	5	3	2	2	4	4	4	4	5	4	4	5	1	08:50:00
1	5	3	2	3	4	4	5	4	5	4	4	4	3	10:14:00
2	5	2	1	1	2	2	3	2	2	2	3	1	2	07:14:00
2	5	2	1	3	2	5	3	5	4	2	2	2	2	05:10:00
2	5	4	2	4	5	4	4	5	4	4	4	4	n/a	04:07:00
1	5	5	2	4	4	4	4	5	5	5	5	3	3	12:44:00
1	5	4	2	4	3	4	3	5	5	3	4	2	2	11:59:00
2	5	4	2	3	3	3	2	4	2	3	3	4	2	05:24:00
2	5	3	2	3	4	4	4	5	5	3	3	5	4	03:38:00
1	5	4	2	5	4	5	5	5	5	4	4	3	5	18:51:00
